# Supplementary material
Source: publisher site journal article supplement (https://www.dovepress.com/article/351541)
Supplement: Supplementary file 1 [file get_supplementary_file.php]

| Table S1 Core Knowledge, Attitude and Behavior of Tuberculosis | | |
| --- | --- | --- |
| Questionnaire module |  | Question |
| Core Knowledge | Q1 | Tuberculosis is an infectious disease that could seriously endanger human health? |
|  | Q2 | Tuberculosis is mainly transmitted through droplets when patients cough, sneeze or speak loudly? |
|  | Q3 | Those who have a cough, cough up phlegm for more than two weeks, or have blood-stained sputum should be suspected of tuberculosis? |
|  | Q4 | There are specialized institutions for Tuberculosis testing and treatment in cities and towns at or above the county level in China? |
|  | Q5 | Tuberculosis patients should go to professional tuberculosis prevention and control institutions for testing, treatment and management? |
|  | Q6 | As long as regular treatment is maintained, most tuberculosis cases can be cured? |
|  | Q7 | Does our country provide free first-line anti-tuberculosis drugs and major tests for infectious tuberculosis patients? |
| Prevention attitude and behavior | Q8 | Should we care about tuberculosis patients, and shouldn't discriminate against them? |
|  | Q9 | If someone around you gets tuberculosis, will you take the initiative to do tuberculosis testing? |
|  | Q10 | If you have a cough, cough up phlegm for more than two weeks, or blood-stained sputum, will you take the initiative to see a doctor? |
|  | Q11 | If you have tuberculosis, will you remind people around you to go to the hospital for tuberculosis-related testing? |
|  | Q12 | If you have tuberculosis, would you choose to go to a professional tuberculosis prevention and control institution for treatment? |
|  | Q13 | Do you frequently open windows for ventilation? |
|  | Q14 | Do you spit in public? |
